# Supplementary material for: Extraction of Gallic Acid and Ferulic Acid for Application in Hair Supplements
Source: MDPI journal article supplement (doi:10.3390/molecules28052369), 2023-03-04
Supplement: s1 [file s1]

## Supplementary Materials

### Extraction of gallic acid and ferulic acid for application in hair supplements

Pedro Velho <sup>1,2,a</sup>, Catarina S. Rebelo <sup>1,2,b</sup>, Eugénia A. Macedo <sup>1,2,\*</sup>

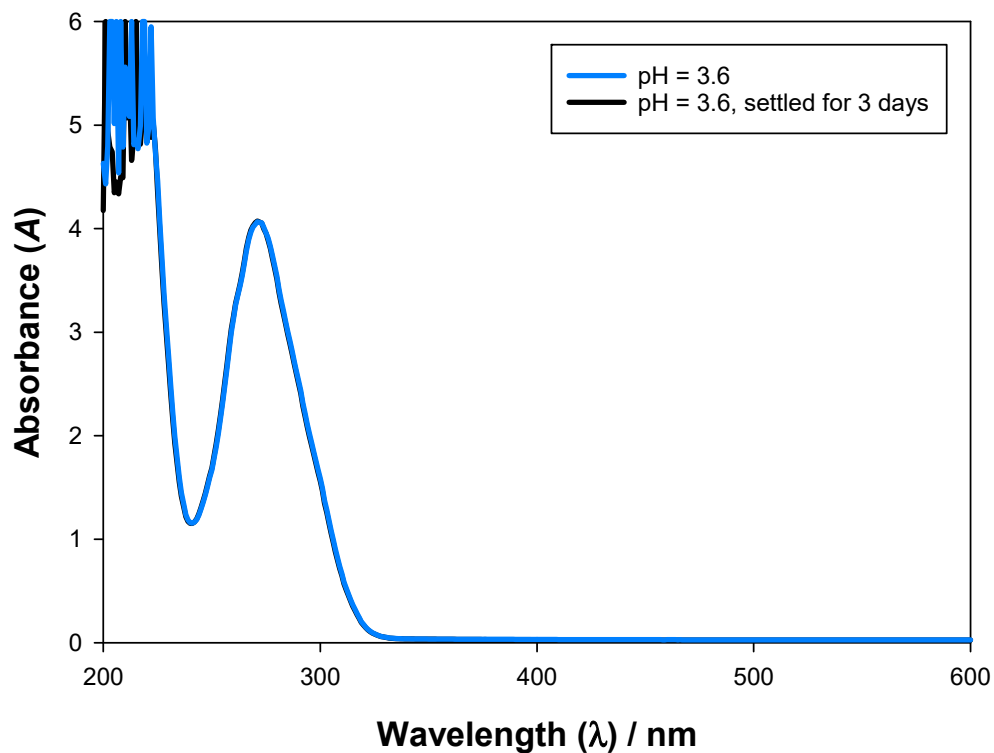

**Figure S1.** UV-Vis absorbance spectra of the aqueous stock solution of gallic acid ( $1.36 \cdot 10^{-4} \text{ g} \cdot \text{mL}^{-1}$  and  $\text{pH} = 3.59$ ) in the moment of preparation and after 3 days of settling at 298.15 K and 0.1 MPa.

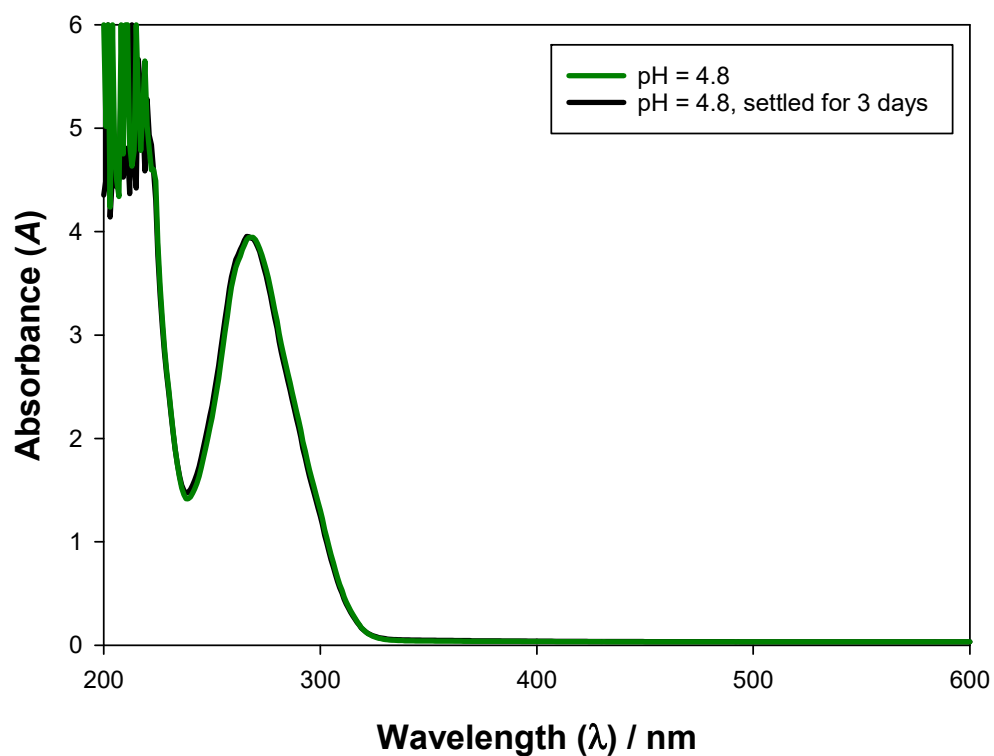

**Figure S2.** UV-Vis absorbance spectra of the aqueous stock solution of gallic acid ( $1.49 \cdot 10^{-4} \text{ g} \cdot \text{mL}^{-1}$  and  $\text{pH} = 4.78$ ) in the moment of preparation and after 3 days of settling at 298.15 K and 0.1 MPa.

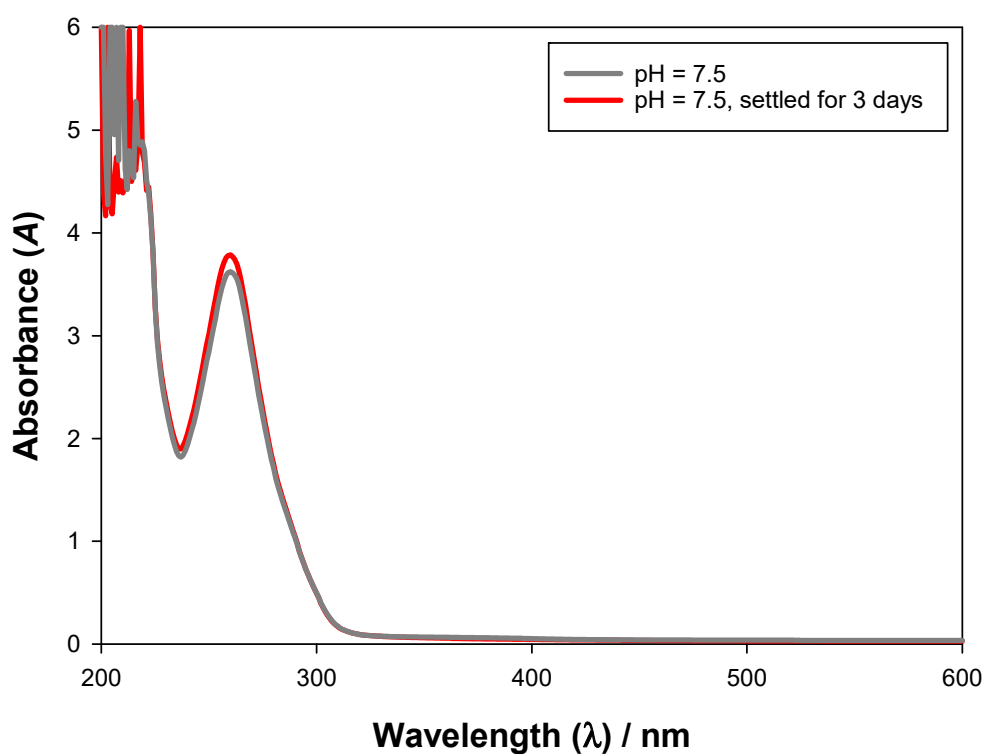

**Figure S3.** UV-Vis absorbance spectra of the aqueous stock solution of gallic acid ( $1.49 \cdot 10^{-4} \text{ g} \cdot \text{mL}^{-1}$  and  $\text{pH} = 7.53$ ) in the moment of preparation and after 3 days of settling at 298.15 K and 0.1 MPa.

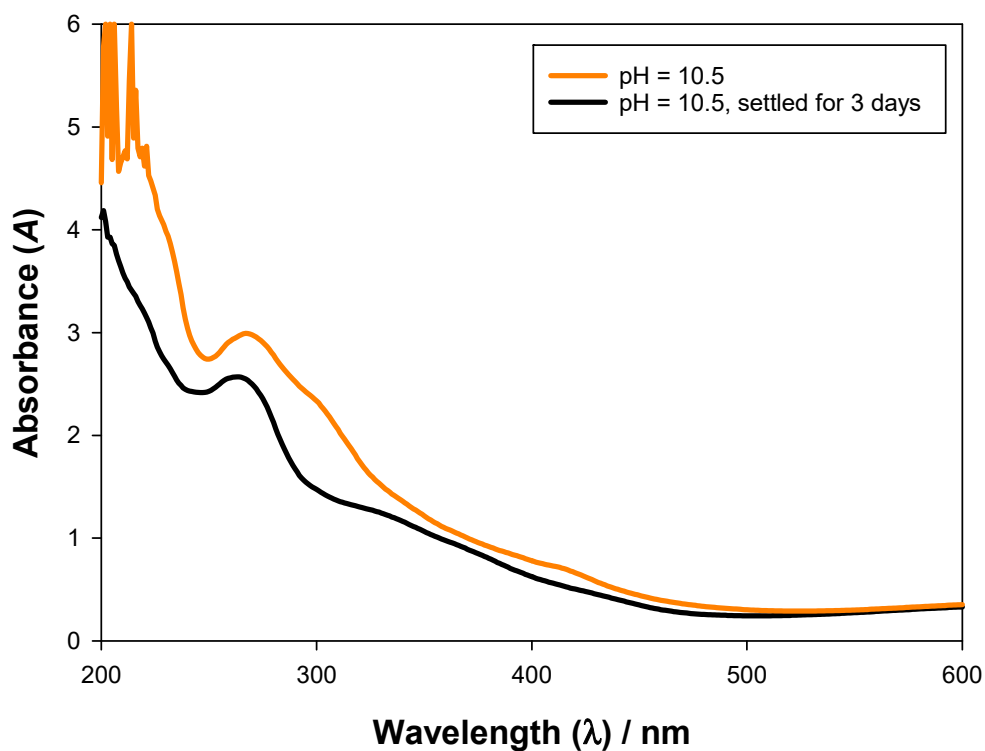

**Figure S4.** UV-Vis absorbance spectra of the aqueous stock solution of gallic acid ( $1.48 \cdot 10^{-4} \text{ g} \cdot \text{mL}^{-1}$  and pH = 10.52) in the moment of preparation and after 3 days of settling at 298.15 K and 0.1 MPa.

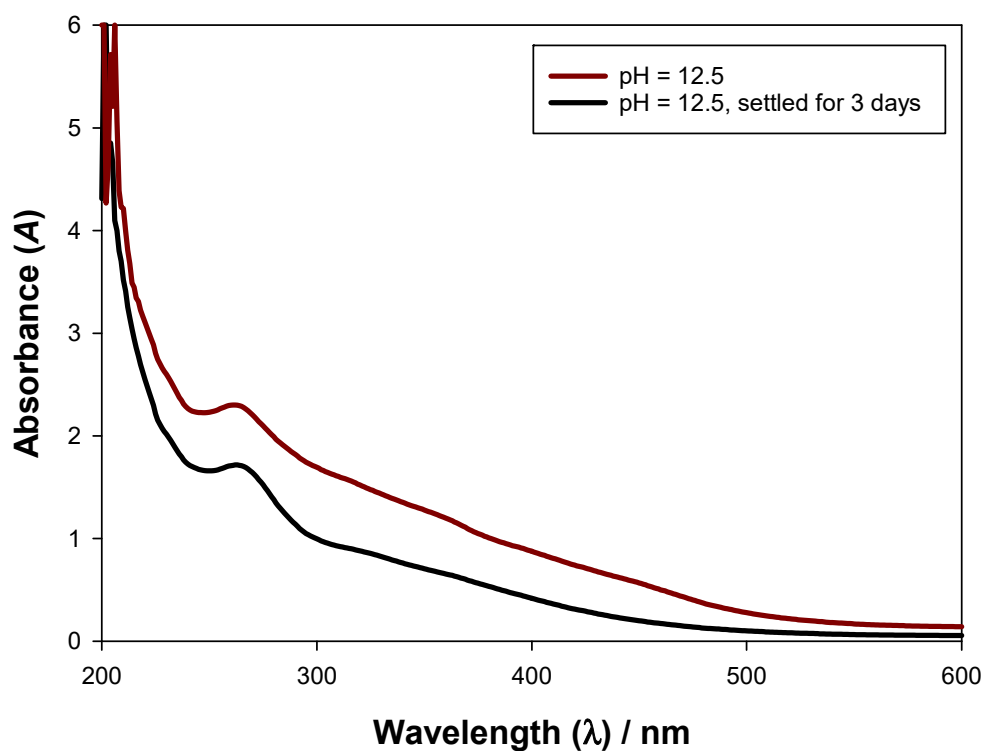

**Figure S5.** UV-Vis absorbance spectra of the aqueous stock solution of gallic acid ( $1.46 \cdot 10^{-4} \text{ g} \cdot \text{mL}^{-1}$  and pH = 12.5) in the moment of preparation and after 3 days of settling at 298.15 K and 0.1 MPa.

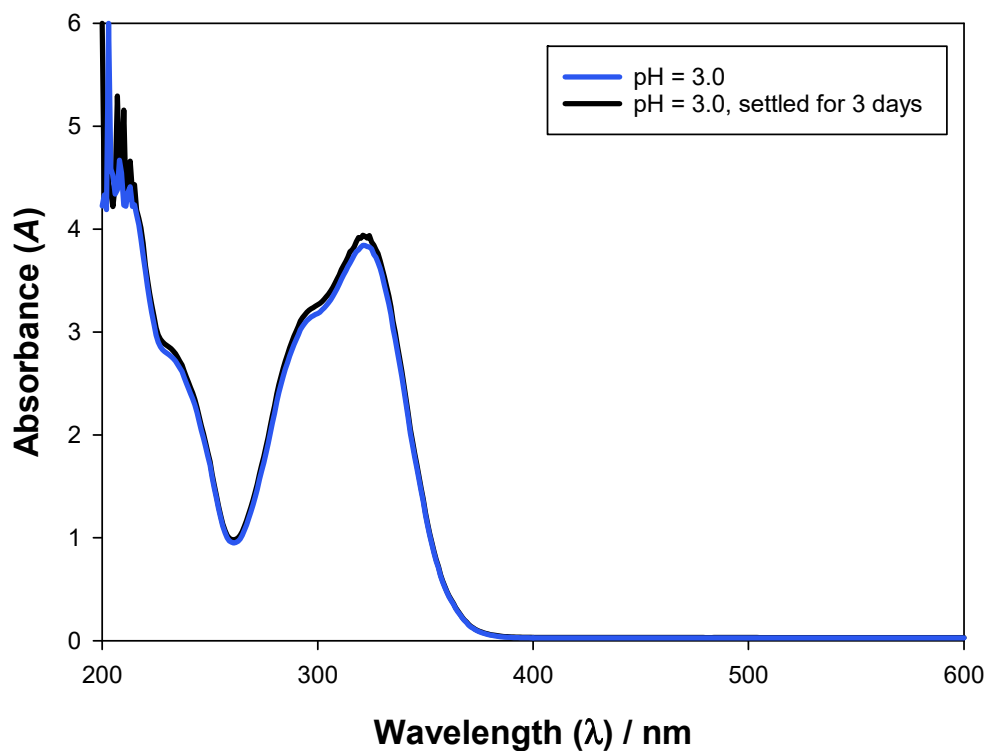

**Figure S6.** UV-Vis absorbance spectra of the aqueous stock solution of ferulic acid ( $7.91 \cdot 10^{-5} \text{ g} \cdot \text{mL}^{-1}$  and pH = 3.0) in the moment of preparation and after 3 days of settling at 298.15 K and 0.1 MPa.

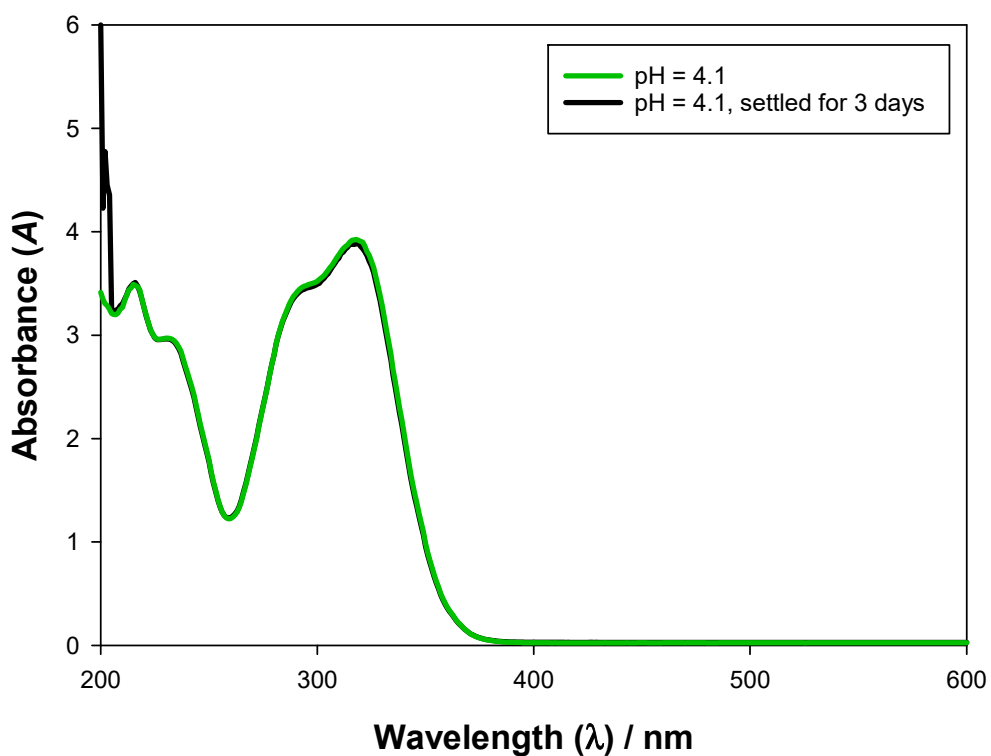

**Figure S7.** UV-Vis absorbance spectra of the aqueous stock solution of ferulic acid ( $8.25 \cdot 10^{-5} \text{ g} \cdot \text{mL}^{-1}$  and pH = 4.1) in the moment of preparation and after 3 days of settling at 298.15 K and 0.1 MPa.

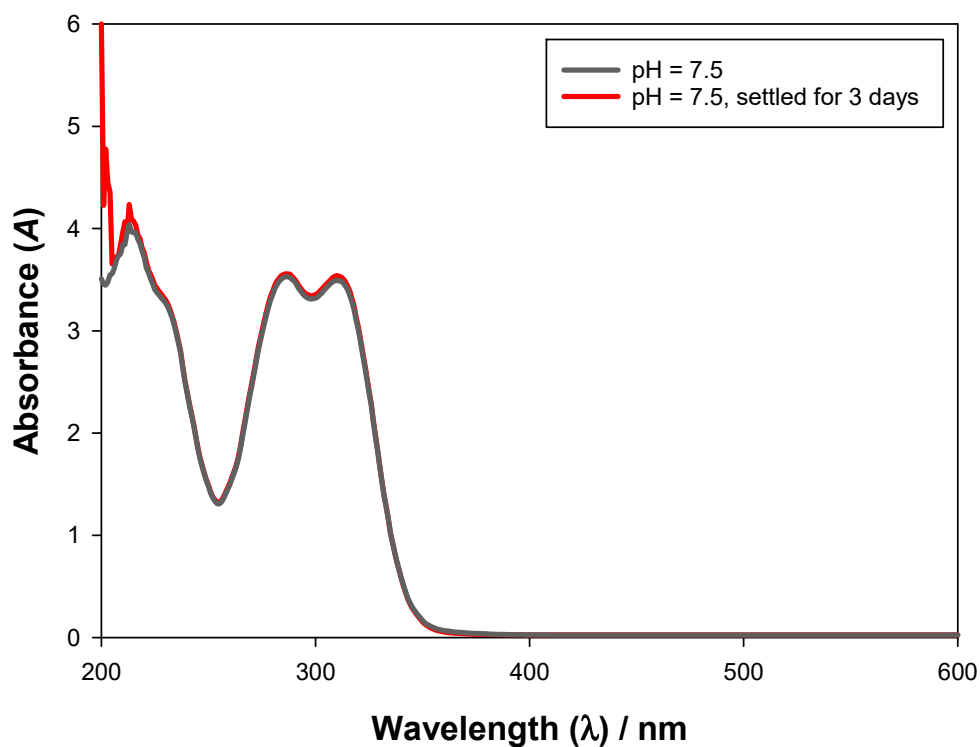

**Figure S8.** UV-Vis absorbance spectra of the aqueous stock solution of ferulic acid ( $8.21 \cdot 10^{-5} \text{ g} \cdot \text{mL}^{-1}$  and pH = 7.5) in the moment of preparation and after 3 days of settling at 298.15 K and 0.1 MPa.

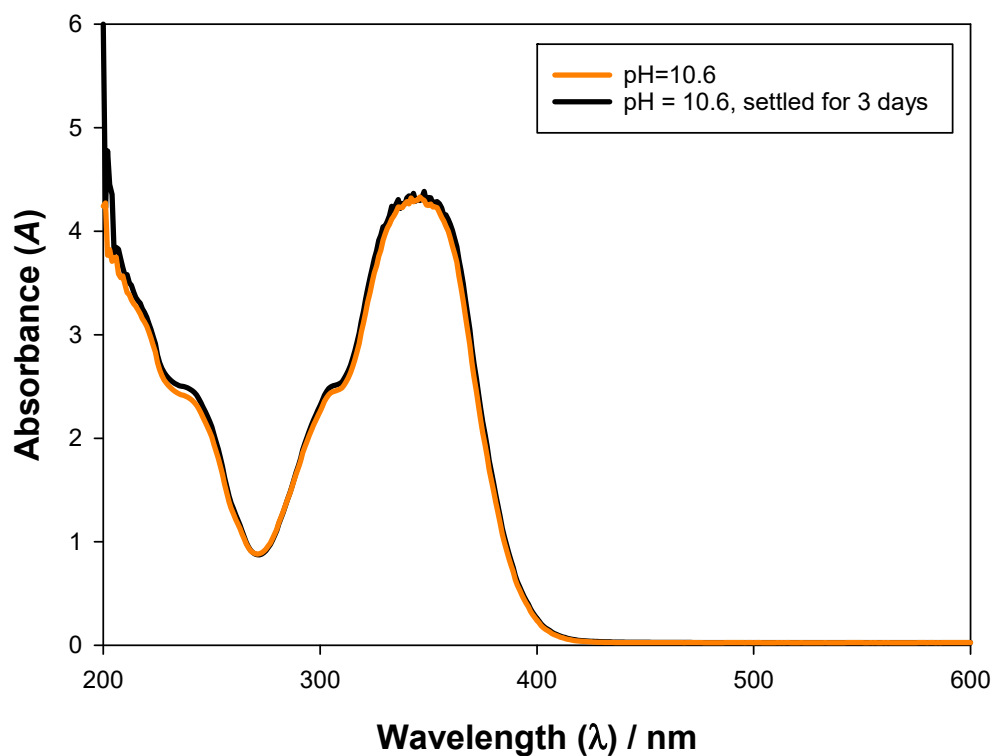

**Figure S9.** UV-Vis absorbance spectra of the aqueous stock solution of ferulic acid ( $8.22 \cdot 10^{-5} \text{ g} \cdot \text{mL}^{-1}$  and pH = 10.6) in the moment of preparation and after 3 days of settling at 298.15 K and 0.1 MPa.

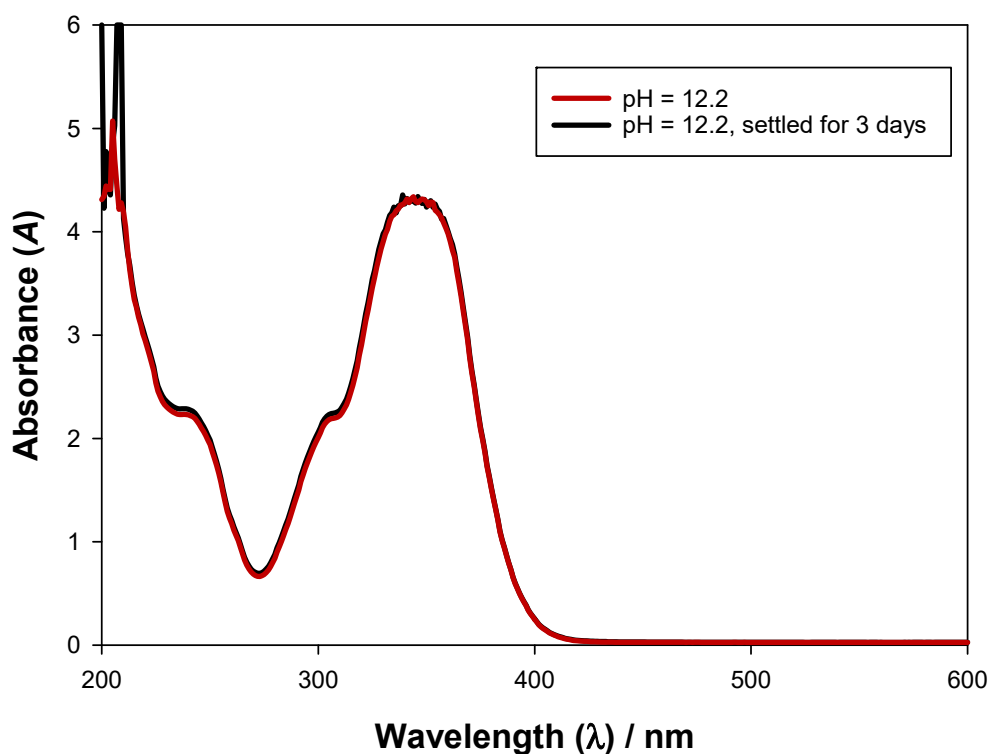

**Figure S10.** UV-Vis absorbance spectra of the aqueous stock solution of ferulic acid ( $7.84 \cdot 10^{-5} \text{ g} \cdot \text{mL}^{-1}$  and pH = 12.2) in the moment of preparation and after 3 days of settling at 298.15 K and 0.1 MPa.

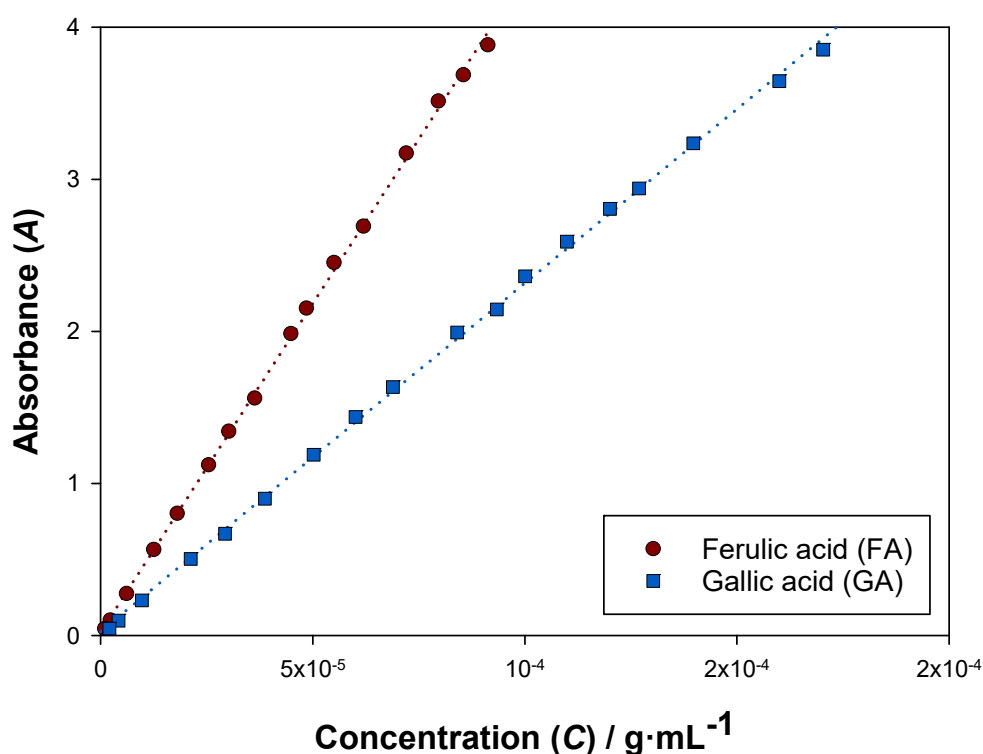

**Figure S11.** UV-Vis absorbance calibration curves for gallic acid ( $\lambda = 260 \text{ nm}$ ) and ferulic acid ( $\lambda = 310 \text{ nm}$ ) at pH = 7.5,  $T = 298.15 \text{ K}$  and  $P = 0.1 \text{ MPa}$ . The first-degree fittings follow equations:  $A = 22\,917.3 \cdot C_{\text{GA}} (\text{g} \cdot \text{mL}^{-1}) + 0.0252$  with a determination coefficient ( $R^2$ ) of 0.9992 and  $A = 43\,253.3 \cdot C_{\text{FA}} (\text{g} \cdot \text{mL}^{-1}) + 0.0211$  with  $R^2 = 0.9993$ , respectively.

**Table S1:** Calculated mole fractions of each antioxidant stage and mean electrical charge ( $q$ ) at different pH values for gallic acid (GA).

| pH   | $x_{GA^0}^a$ | $x_{GA^{-1}}$ | $x_{GA^{-2}}$ | $x_{GA^{-3}}$ | $q / e$ |
|------|--------------|---------------|---------------|---------------|---------|
| 0.00 | 1.00         | 0.00          | 0.00          | 0.00          | 0.00    |
| 0.25 | 1.00         | 0.00          | 0.00          | 0.00          | 0.00    |
| 0.50 | 1.00         | 0.00          | 0.00          | 0.00          | 0.00    |
| 0.75 | 1.00         | 0.00          | 0.00          | 0.00          | 0.00    |
| 1.00 | 1.00         | 0.00          | 0.00          | 0.00          | 0.00    |
| 1.25 | 1.00         | 0.00          | 0.00          | 0.00          | 0.00    |
| 1.50 | 1.00         | 0.00          | 0.00          | 0.00          | 0.00    |
| 1.75 | 1.00         | 0.00          | 0.00          | 0.00          | 0.00    |
| 2.00 | 0.99         | 0.01          | 0.00          | 0.00          | -0.01   |
| 2.25 | 0.99         | 0.01          | 0.00          | 0.00          | -0.01   |
| 2.50 | 0.98         | 0.02          | 0.00          | 0.00          | -0.02   |
| 2.75 | 0.97         | 0.03          | 0.00          | 0.00          | -0.03   |
| 3.00 | 0.95         | 0.05          | 0.00          | 0.00          | -0.05   |
| 3.25 | 0.91         | 0.09          | 0.00          | 0.00          | -0.09   |
| 3.50 | 0.86         | 0.14          | 0.00          | 0.00          | -0.14   |
| 3.75 | 0.77         | 0.23          | 0.00          | 0.00          | -0.23   |
| 4.00 | 0.66         | 0.34          | 0.00          | 0.00          | -0.34   |
| 4.25 | 0.52         | 0.48          | 0.00          | 0.00          | -0.48   |
| 4.50 | 0.38         | 0.62          | 0.00          | 0.00          | -0.62   |
| 4.75 | 0.25         | 0.75          | 0.00          | 0.00          | -0.75   |
| 5.00 | 0.16         | 0.84          | 0.00          | 0.00          | -0.84   |
| 5.25 | 0.10         | 0.90          | 0.00          | 0.00          | -0.90   |
| 5.50 | 0.06         | 0.94          | 0.00          | 0.00          | -0.94   |
| 5.75 | 0.03         | 0.97          | 0.00          | 0.00          | -0.97   |
| 6.00 | 0.02         | 0.98          | 0.00          | 0.00          | -0.98   |
| 6.25 | 0.01         | 0.99          | 0.00          | 0.00          | -0.99   |
| 6.50 | 0.01         | 0.99          | 0.01          | 0.00          | -1.00   |
| 6.75 | 0.00         | 0.98          | 0.01          | 0.00          | -1.01   |
| 7.00 | 0.00         | 0.97          | 0.02          | 0.00          | -1.02   |
| 7.25 | 0.00         | 0.96          | 0.04          | 0.00          | -1.04   |
| 7.50 | 0.00         | 0.93          | 0.07          | 0.00          | -1.07   |
| 7.75 | 0.00         | 0.88          | 0.12          | 0.00          | -1.12   |

|       |      |      |      |      |       |
|-------|------|------|------|------|-------|
| 8.00  | 0.00 | 0.81 | 0.19 | 0.00 | -1.19 |
| 8.25  | 0.00 | 0.70 | 0.30 | 0.00 | -1.30 |
| 8.50  | 0.00 | 0.57 | 0.43 | 0.00 | -1.43 |
| 8.75  | 0.00 | 0.43 | 0.57 | 0.00 | -1.57 |
| 9.00  | 0.00 | 0.29 | 0.71 | 0.00 | -1.71 |
| 9.25  | 0.00 | 0.19 | 0.81 | 0.00 | -1.81 |
| 9.50  | 0.00 | 0.12 | 0.88 | 0.00 | -1.89 |
| 9.75  | 0.00 | 0.07 | 0.92 | 0.01 | -1.94 |
| 10.00 | 0.00 | 0.04 | 0.95 | 0.01 | -1.97 |
| 10.25 | 0.00 | 0.02 | 0.96 | 0.02 | -2.00 |
| 10.50 | 0.00 | 0.01 | 0.95 | 0.04 | -2.03 |
| 10.75 | 0.00 | 0.01 | 0.93 | 0.07 | -2.06 |
| 11.00 | 0.00 | 0.00 | 0.88 | 0.11 | -2.11 |
| 11.25 | 0.00 | 0.00 | 0.82 | 0.18 | -2.18 |
| 11.50 | 0.00 | 0.00 | 0.71 | 0.28 | -2.28 |
| 11.75 | 0.00 | 0.00 | 0.59 | 0.41 | -2.41 |
| 12.00 | 0.00 | 0.00 | 0.44 | 0.56 | -2.56 |
| 12.25 | 0.00 | 0.00 | 0.31 | 0.69 | -2.69 |
| 12.50 | 0.00 | 0.00 | 0.20 | 0.80 | -2.80 |
| 12.75 | 0.00 | 0.00 | 0.12 | 0.88 | -2.88 |
| 13.00 | 0.00 | 0.00 | 0.07 | 0.93 | -2.93 |
| 13.25 | 0.00 | 0.00 | 0.04 | 0.96 | -2.96 |
| 13.50 | 0.00 | 0.00 | 0.02 | 0.98 | -2.98 |
| 13.75 | 0.00 | 0.00 | 0.01 | 0.99 | -2.99 |
| 14.00 | 0.00 | 0.00 | 0.01 | 0.99 | -2.99 |

<sup>a</sup>  $x_{\text{GA}^0}$ ,  $x_{\text{GA}^{-1}}$ ,  $x_{\text{GA}^{-2}}$  and  $x_{\text{GA}^{-3}}$  are the mole fractions of gallic acid in the antioxidant stages of electrical charges equal to 0, -1, -2 and -3 e, respectively. e stands for the elementary charge ( $1.602 \cdot 10^{-19}$  C).

**Table S2:** Calculated mole fractions of each antioxidant stage and mean electrical charge ( $q$ ) at different pH values for ferulic acid (FA).

| pH   | $x_{\text{FA}^0}$ <sup>a</sup> | $x_{\text{FA}^{-1}}$ | $x_{\text{FA}^{-2}}$ | $q / e$ |
|------|--------------------------------|----------------------|----------------------|---------|
| 0    | 1.00                           | 0.00                 | 0.00                 | 0.00    |
| 0.25 | 1.00                           | 0.00                 | 0.00                 | 0.00    |
| 0.5  | 1.00                           | 0.00                 | 0.00                 | 0.00    |
| 0.75 | 1.00                           | 0.00                 | 0.00                 | 0.00    |
| 1    | 1.00                           | 0.00                 | 0.00                 | 0.00    |
| 1.25 | 1.00                           | 0.00                 | 0.00                 | 0.00    |
| 1.5  | 1.00                           | 0.00                 | 0.00                 | 0.00    |
| 1.75 | 1.00                           | 0.00                 | 0.00                 | 0.00    |
| 2    | 1.00                           | 0.00                 | 0.00                 | 0.00    |
| 2.25 | 0.99                           | 0.01                 | 0.00                 | -0.01   |
| 2.5  | 0.99                           | 0.01                 | 0.00                 | -0.01   |
| 2.75 | 0.98                           | 0.02                 | 0.00                 | -0.02   |
| 3    | 0.97                           | 0.03                 | 0.00                 | -0.03   |
| 3.25 | 0.95                           | 0.05                 | 0.00                 | -0.05   |
| 3.5  | 0.91                           | 0.09                 | 0.00                 | -0.09   |
| 3.75 | 0.85                           | 0.15                 | 0.00                 | -0.15   |
| 4    | 0.76                           | 0.24                 | 0.00                 | -0.24   |
| 4.25 | 0.64                           | 0.36                 | 0.00                 | -0.36   |
| 4.5  | 0.50                           | 0.50                 | 0.00                 | -0.50   |
| 4.75 | 0.36                           | 0.64                 | 0.00                 | -0.64   |
| 5    | 0.24                           | 0.76                 | 0.00                 | -0.76   |
| 5.25 | 0.15                           | 0.85                 | 0.00                 | -0.85   |
| 5.5  | 0.09                           | 0.91                 | 0.00                 | -0.91   |
| 5.75 | 0.05                           | 0.95                 | 0.00                 | -0.95   |
| 6    | 0.03                           | 0.97                 | 0.00                 | -0.97   |
| 6.25 | 0.02                           | 0.98                 | 0.00                 | -0.98   |
| 6.5  | 0.01                           | 0.99                 | 0.00                 | -0.99   |
| 6.75 | 0.01                           | 0.99                 | 0.01                 | -1.00   |
| 7    | 0.00                           | 0.99                 | 0.01                 | -1.01   |



|       |      |      |      |       |
|-------|------|------|------|-------|
| 7.25  | 0.00 | 0.98 | 0.02 | -1.02 |
| 7.5   | 0.00 | 0.96 | 0.04 | -1.04 |
| 7.75  | 0.00 | 0.94 | 0.06 | -1.06 |
| 8     | 0.00 | 0.89 | 0.11 | -1.11 |
| 8.25  | 0.00 | 0.82 | 0.18 | -1.18 |
| 8.5   | 0.00 | 0.72 | 0.28 | -1.28 |
| 8.75  | 0.00 | 0.60 | 0.40 | -1.40 |
| 9     | 0.00 | 0.45 | 0.55 | -1.55 |
| 9.25  | 0.00 | 0.32 | 0.68 | -1.68 |
| 9.5   | 0.00 | 0.21 | 0.79 | -1.79 |
| 9.75  | 0.00 | 0.13 | 0.87 | -1.87 |
| 10    | 0.00 | 0.08 | 0.92 | -1.92 |
| 10.25 | 0.00 | 0.04 | 0.96 | -1.96 |
| 10.5  | 0.00 | 0.03 | 0.97 | -1.97 |
| 10.75 | 0.00 | 0.01 | 0.99 | -1.99 |
| 11    | 0.00 | 0.01 | 0.99 | -1.99 |
| 11.25 | 0.00 | 0.00 | 1.00 | -2.00 |
| 11.5  | 0.00 | 0.00 | 1.00 | -2.00 |
| 11.75 | 0.00 | 0.00 | 1.00 | -2.00 |
| 12    | 0.00 | 0.00 | 1.00 | -2.00 |
| 12.25 | 0.00 | 0.00 | 1.00 | -2.00 |
| 12.5  | 0.00 | 0.00 | 1.00 | -2.00 |
| 12.75 | 0.00 | 0.00 | 1.00 | -2.00 |
| 13    | 0.00 | 0.00 | 1.00 | -2.00 |
| 13.25 | 0.00 | 0.00 | 1.00 | -2.00 |
| 13.5  | 0.00 | 0.00 | 1.00 | -2.00 |
| 13.75 | 0.00 | 0.00 | 1.00 | -2.00 |
| 14    | 0.00 | 0.00 | 1.00 | -2.00 |

<sup>a</sup>  $x_{\text{FA}^0}$ ,  $x_{\text{FA}^{-1}}$  and  $x_{\text{FA}^{-2}}$  are the mole fractions of ferulic acid in the antioxidant stages of electrical charges equal to 0, -1 and -2 e, respectively. e stands for the elementary charge ( $1.602 \cdot 10^{-19}$  C).
